# Supplementary material for: A Qualitative Model of the Differentiation Network in Chondrocyte Maturation: A Holistic View of Chondrocyte Hypertrophy
Source: PLOS journal article supplement (doi:10.1371/journal.pone.0162052), 2016-08-31
Supplement: S3 (10.1371/journal.pone.0162052.s003) [file journal.pone.0162052.s003]

## Full list of equations of the chondrocyte gene regulatory network.

Note that some factors act in complex (e.g. SMAD3-NKX3.2 inhibition of RUNX2). The regulation of GSK3 $\beta$  is dependent on sequential phosphorylation by ERK and PKA [1,2], which was modelled as a multiplication. For nodes that have majority of inhibitions, these were saturated first (this is the case for SMAD3 and CCND1).

Each gene/node is numbered according to the table below.

| Node             | Number | Node                | Number |
|------------------|--------|---------------------|--------|
| WNT              | 1      | SMAD3               | 26     |
| DSH              | 2      | FGFR1               | 27     |
| IGF-I            | 3      | ATF2                | 28     |
| R-SMAD           | 4      | NF $\kappa$ $\beta$ | 29     |
| IHH              | 5      | HDAC4               | 30     |
| GLI2             | 6      | CCND1               | 31     |
| $\beta$ -CATENIN | 7      | DLX5                | 32     |
| LEF/TCF          | 8      | BMP                 | 33     |
| RUNX2            | 9      | P38                 | 34     |
| SOX9             | 10     | GSK3 $\beta$        | 35     |
| PTHRP            | 11     | DC                  | 36     |
| PPR              | 12     | PP2A                | 37     |
| PKA              | 14     | AKT                 | 38     |
| MEF2C            | 15     | PI3K                | 39     |
| FGF              | 16     | ETS1                | 40     |
| FGFR3            | 17     | RAS                 | 41     |
| STAT1            | 18     | IGF-IR              | 42     |
| Smad complex     | 19     | MSX2                | 43     |
| NKX3.2           | 21     | $\delta$ -EF1       | 44     |
| ERK1/2           | 22     | ATF4                | 45     |
| TGF $\beta$      | 23     | HIF-2 $\alpha$      | 46     |
| SMAD7            | 25     |                     |        |

Each node's activity  $z$  is determined by the product of its fast and slow variable ( $z = z^f \times z^s$ ).

The standard saturation factor is 2/3. Therefore  $s_i = 2 * \frac{\text{saturation factor}}{i}$  where  $i$  is the number of excess positive interactions ( $i > 1$ ).

$$z_1^f(t+1) = 1$$

$$z_1^s(t+1) = z_6(t) + z_7(t)z_8(t) - z_{43}(t)$$

$$z_2^f(t+1) = z_1(t) - 0.5z_4(t)$$

$$z_2^s(t+1) = 1$$

$$z_3^f(t+1) = 1$$

$$z_3^s(t+1) = z_{14}(t)$$

$$z_4^f(t+1) = z_{33}(t) - z_{25}(t)$$

$$z_4^s(t+1) = 1$$

$$z_5^f(t+1) = 1$$

$$z_5^s(t+1) = (z_9(t)z_{19}(t) + z_{29}(t) + z_{45}(t) - z_{44}(t))s_2$$

$$z_6^f(t+1) = z_5(t)$$

$$z_6^s(t+1) = 1$$

$$z_7^f(t+1) = 1 - z_{36}(t)$$

$$z_7^s(t+1) = 1$$

$$z_8^f(t+1) = z_7(t) - z_{10}(t)$$

$$z_8^s(t+1) = (1 + z_7(t) + z_9(t))s_3$$

$$z_9^f(t+1) = z_{38}(t) + z_{22}(t) + z_{32}(t) + z_{14}(t) - z_{10}(t) - z_{26}(t)z_{30}(t) - z_{31}(t) - z_{43}(t)$$

$$z_9^s(t+1) = (z_{46}(t) + z_8(t) + z_9(t) + z_{15}(t) + z_{32}(t) - z_{21}(t)z_{19}(t) - z_{43}(t))s_3$$

$$z_{10}^f(t+1) = z_{14}(t) + z_{26}(t) - z_7(t) - z_9(t)$$

$$z_{10}^s(t+1) = (z_{14}(t) + z_{34}(t) + z_{29}(t) + z_{10}(t) + z_{21}(t) - z_{29}(t))s_4$$

$$z_{11}^f(t+1) = 1$$

$$z_{11}^s(t+1) = (z_6(t)z_{10}(t) + z_{14}(t) + z_{26}(t))s_3$$

$$z_{12}^f(t+1) = z_{11}(t)$$

$$z_{12}^s(t+1) = (z_6(t) + z_{10}(t) + z_{19}(t) - z_{18}(t))s_2$$

$$z_{14}^f(t+1) = (z_3(t) + z_{12}(t))s_2$$

$$z_{14}^s(t+1) = 1$$

$$z_{15}^f(t+1) = z_{19}(t) + z_{34}(t) - z_{30}(t) - z_{26}(t)$$

$$z_{15}^s(t+1) = (z_9(t) + z_{19}(t))s_2$$

$$z_{16}^f(t+1) = 1$$

$$z_{16}^s(t+1) = (z_7(t) + z_9(t))s_2$$

$$z_{17}^f(t+1) = z_{16}(t)$$

$$z_{17}^s(t+1) = z_{10}(t)$$

$$z_{18}^f(t+1) = (z_{17}(t) + z_{27}(t) + z_{42}(t) - z_{19}(t))s_2$$

$$z_{18}^s(t+1) = 1$$

$$z_{19}^f(t+1) = z_4(t) - z_{22}(t)$$

$$z_{19}^s(t+1) = 1$$

$$z_{21}^f(t+1) = 1$$

$$z_{21}^s(t+1) = (z_{10}(t) + z_{12}(t))s_2$$

$$z_{22}^f(t+1) = z_{41}(t) - z_{37}(t)$$

$$z_{22}^s(t+1) = 1$$

$$z_{23}^f(t+1) = 1$$

$$z_{23}^s(t+1) = z_6(t)$$

$$z_{25}^f(t+1) = 1$$

$$z_{25}^s(t+1) = (z_{18}(t) + z_{19}(t) + z_{26}(t) + z_{29}(t))s_4$$

$$z_{26}^f(t+1) = z_{23}(t) - 0.5s_3(z_{25}(t) + z_{22}(t) + z_{31}(t))$$

$$z_{26}^s(t+1) = 1$$

$$z_{27}^f(t+1) = z_{16}(t) - 0.5z_{19}(t)$$

$$z_{27}^s(t+1) = z_9(t)$$

$$z_{28}^f(t+1) = z_{26}(t)z_{34}(t)$$

$$z_{28}^s(t+1) = z_{26}(t)$$

$$z_{29}^f(t+1) = (z_{27}(t) + z_{38}(t))s_2$$

$$z_{29}^s(t+1) = 1$$

$$z_{30}^f(t+1) = z_{37}(t) - z_{35}(t)$$

$$z_{30}^s(t+1) = 1$$

$$z_{31}^f(t+1) = 1 - 0.5s_2(z_{35}(t) + z_{18}(t))$$

$$z_{31}^s(t+1) = (z_{29}(t) + z_6(t) + z_{14}(t))s_3$$

$$z_{32}^f(t+1) = z_{34}(t) + z_{19}(t) - z_{43}(t)$$

$$z_{32}^s(t+1) = z_{15}(t) + z_{19}(t) - z_{26}(t) - z_{43}(t)$$

$$z_{33}^f(t+1) = 1$$

$$z_{33}^s(t+1) = (z_6(t) + z_{29}(t))s_2$$

$$z_{34}^f(t+1) = (z_{23}(t) + z_4(t))s_2$$

$$z_{34}^s(t+1) = 1$$

$$z_{35}^f(t+1) = 1 - z_{14}(t)z_{22}(t)$$

$$z_{35}^s(t+1) = 1$$

$$z_{36}^f(t+1) = 1 - z_2(t)$$

$$z_{36}^s(t+1) = 1$$

$$z_{37}^f(t+1) = z_{14}(t)$$

$$z_{37}^s(t+1) = 1$$

$$z_{38}^f(t+1) = z_{39}(t) - 0.5z_{37}(t)$$

$$z_{38}^s(t+1) = z_9(t)$$

$$z_{39}^f(t+1) = (z_{41}(t) + z_{42}(t))s_2$$

$$z_{39}^s(t+1) = z_9(t)$$

$$z_{40}^f(t+1) = (z_{22}(t) + z_{35}(t))s_2$$

$$z_{40}^s(t+1) = z_{26}(t)$$

$$z_{41}^f(t+1) = (z_1(t) + z_{33}(t) + z_{17}(t) + z_{27}(t))s_4$$

$$z_{41}^s(t+1) = 1$$

$$z_{42}^f(t+1) = z_3(t)$$

$$z_{42}^s(t+1) = z_{23}(t) + z_{29}(t) - z_{18}(t)$$

$$z_{43}^f(t+1) = 1 - z_{32}(t)$$

$$z_{43}^s(t+1) = z_{19}(t) + z_{26}(t) - z_{32}(t)$$

$$z_{44}^f(t+1) = 1$$

$$z_{44}^s(t+1) = (z_{29}(t) + z_{40}(t))s_2$$

$$z_{45}^f(t+1) = (z_{14}(t) + z_{22}(t))s_2$$

$$z_{45}^s(t+1) = 1$$

$$z_{46}^f(t+1) = 1$$

$$z_{46}^s(t+1) = z_{29}(t)$$

### **Reference List**

1. Fang X, Yu SX, Lu Y, Bast RC, Woodgett JR, Mills GB (2000) Phosphorylation and inactivation of glycogen synthase kinase 3 by protein kinase A. Proceedings of the National Academy of Sciences 97: 11960-11965.
2. Ding Q, Xia W, Liu JC, Yang JY, Lee DF, Xia J, Bartholomeusz G, Li Y, Pan Y, Li Z, Bargou RC, Qin J, Lai CC, Tsai FJ, Tsai CH, Hung MC (2005) Erk Associates with and Primes GSK-3b for Its Inactivation Resulting in Upregulation of b-Catenin. Molecular Cell 19: 159-170.
